# Supplementary material
Source: publisher site journal article supplement (https://www.dovepress.com/article/401126)
Supplement: Supplementary file 1 [file get_supplementary_file.php]

**Supplemental table 1**

**Averaged data of latency and amplitude of LMS-induced MEPs from bilateral gastrocnemius muscle before surgery**

| Latency1 (ms)  |   | Base         | Top          | Top-Base    |             |
|----------------|---|--------------|--------------|-------------|-------------|
| RL1            | R | 3.23 ± 0.14  | 4.64 ± 0.26  | 1.41 ± 0.32 |             |
| LL1            | L | 3.19 ± 0.13  | 4.52 ± 0.19  | 1.33 ± 0.26 |             |
|                |   | NS           | NS           | NS          |             |
| Latency2 (ms)  |   | Base         | Top          | Top-Base    |             |
| RL2            | R | 6.09 ± 0.41  | 7.73 ± 0.44  | 1.63 ± 0.39 |             |
| LL2            | L | 6.06 ± 0.30  | 7.51 ± 0.32  | 1.44 ± 0.37 |             |
|                |   | NS           | NS           | NS          |             |
| Latency3 (ms)  |   | Base         | Top          | Top-Base    |             |
| RL3            | R | 10.17 ± 0.41 | 12.41 ± 0.68 | 2.24 ± 0.57 |             |
| LL3            | L | 9.99 ± 0.58  | 12.14 ± 0.62 | 2.14 ± 0.46 |             |
|                |   | NS           | NS           | NS          |             |
| Amplitude (mV) |   | 1            | 2            | 3           | 4           |
| RA             | R | 0.88 ± 0.28  | 1.17 ± 0.77  | 1.35 ± 1.05 | 0.12 ± 0.09 |
| LA             | L | 0.99 ± 0.38  | 1.38 ± 0.48  | 1.75 ± 0.58 | 0.17 ± 0.06 |
|                |   | NS           | NS           | NS          | NS          |

NS; not significant

## Supplemental figure 1

### LMS-induced MEPs amplitudes 2 weeks after surgery

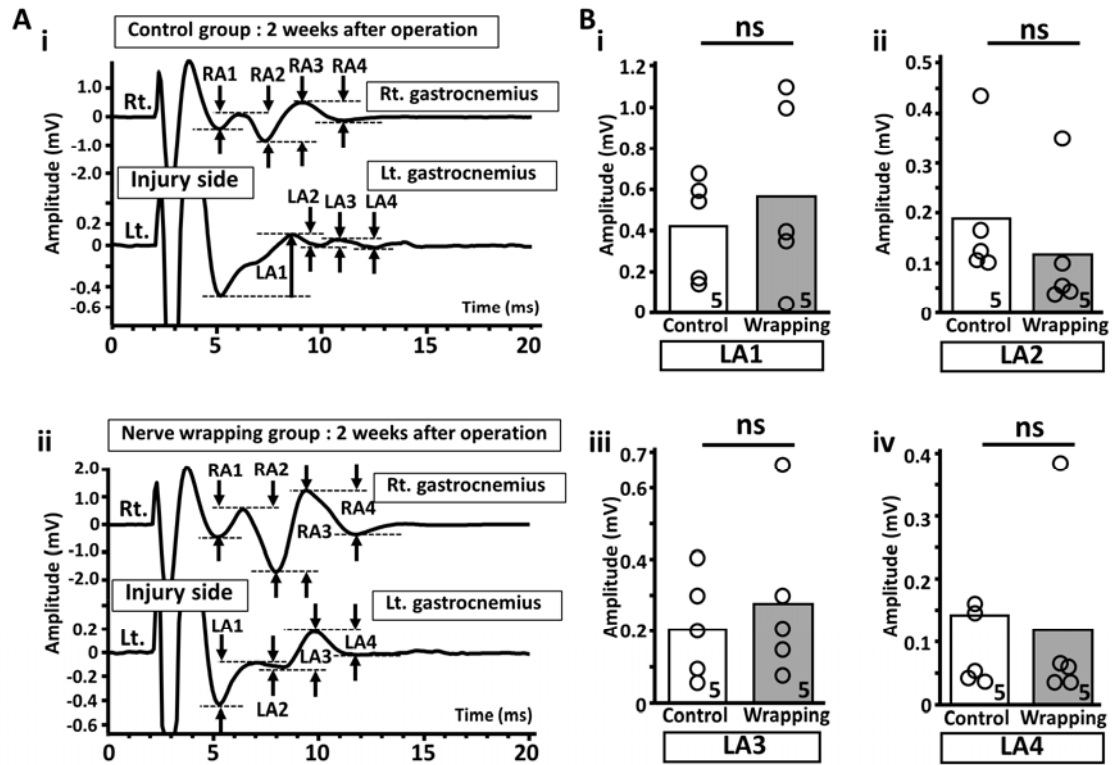

(S1A) Single bilateral MEPs raw data 2 weeks after sciatic nerve surgery. (S1Ai) Control group, (Upper panel of S1Ai) LMS-induced MEPs from the right gastrocnemius muscle. (Lower panel of S1Ai) LMS-induced MEPs from left gastrocnemius muscle. (S1Aii) Nerve wrapping group, (Upper panel of S1Aii) LMS-induced MEPs from the right gastrocnemius muscle. (Lower panel of S1Aii) LMS-induced MEPs from left gastrocnemius muscle. (S1B) Bar graphs of amplitude-related four parameters and comparison between the control group (left panels) and nerve wrapping group (right panels). (S1Bi) Comparison of LA1, (S1Bii) Comparison of LA2, (S1Biii) Comparison of LA3, and (S1Biv) Comparison of LA4. ns; not significant

## Supplemental figure 2

### LMS-induced MEPs latencies 2 weeks after surgery

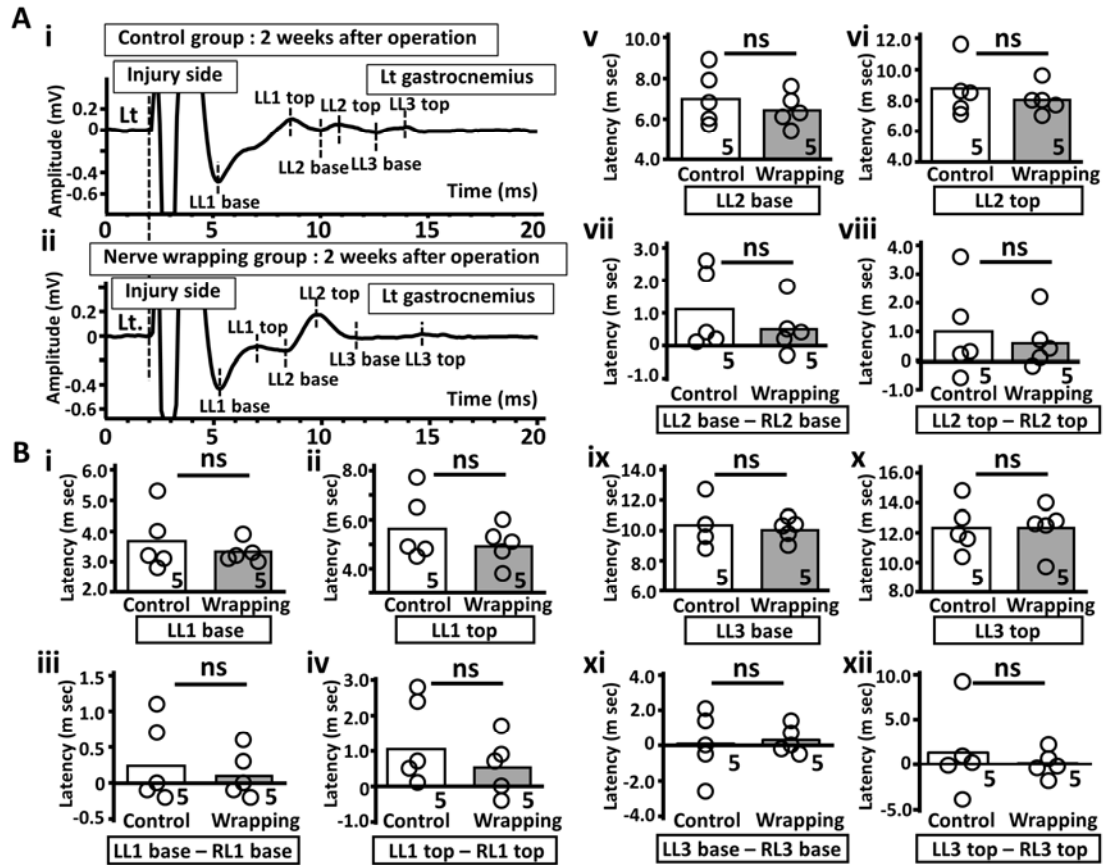

(S2A) Single left MEP raw data 2 weeks after sciatic nerve surgery. (S2Ai) Control group, (S2Aii) Nerve wrapping group. (S2B) Bar graphs of latency-related twelve parameters and comparison between the control group (left bar) and nerve wrapping group (right bar). (S2Bi) Comparison of LL1 base, (S2Bii) Comparison of LL1 top, (S2Biii) Comparison of LL1 base – RL1 base, (S2Biv) Comparison of LL1 top – RL1 top, (S2Bv) Comparison of LL2 base, (S2Bvi) Comparison of LL2 top, (S2Bvii) Comparison of LL2 base – RL2 base, (S2Bviii) Comparison of LL1 top – RL1 top, (S2Bix) Comparison of LL3 base, (S2Bx) Comparison of LL3 top, (S2Bxi) Comparison of LL3 base – RL3 base, and (S2Bxii) Comparison of LL3 top – RL3 top. ns; not significant
